# Supplementary material for: ADMIRE: analysis and visualization of differential methylation in genomic regions using the Infinium HumanMethylation450 Assay
Source: PubMed Central journal article supplement (PMC4666223; doi:10.1186/s13072-015-0045-1), 2015-12-01

29225754

29227941

29228940

fibrillation

fibrillation

fibrillation

fibrillation

fibrillation

fibrillation

control

control

fibrillation

control

control

cg20563468

cg04301754

cg18486902

cg00911123

cg06642965

cg08273957

cg00946992

cg20286114

cg15925383

cg21886425

cg16791619

cg05359130

cg04723401

cg05857941

beta value

0

0.5

1

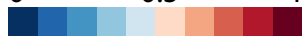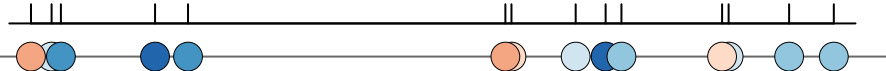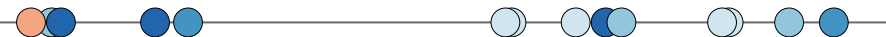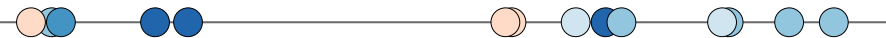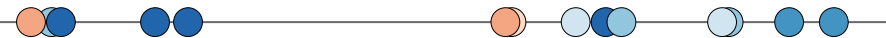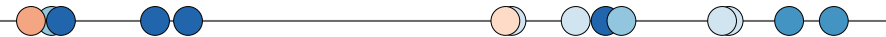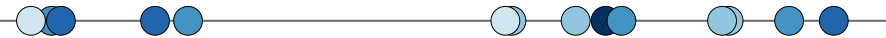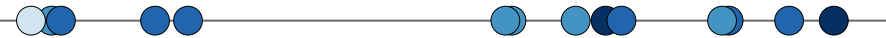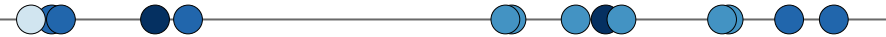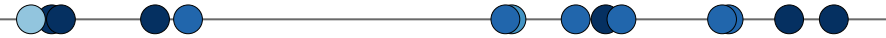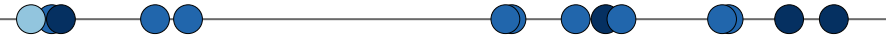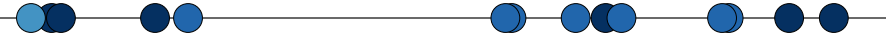

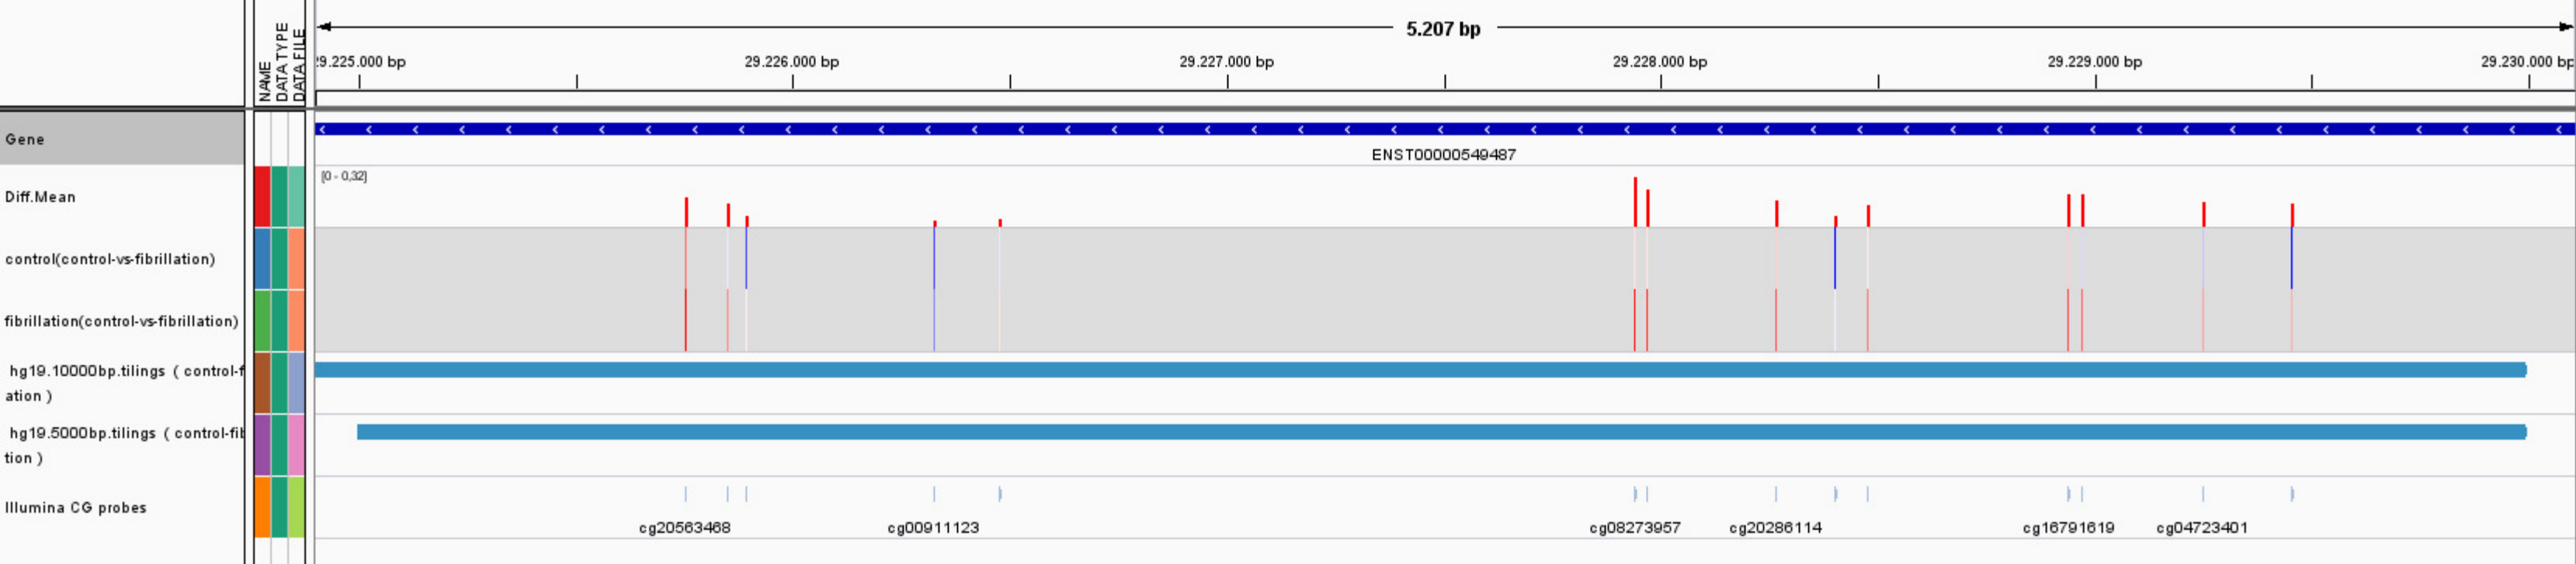



# Enrichment Plot: chr14q11

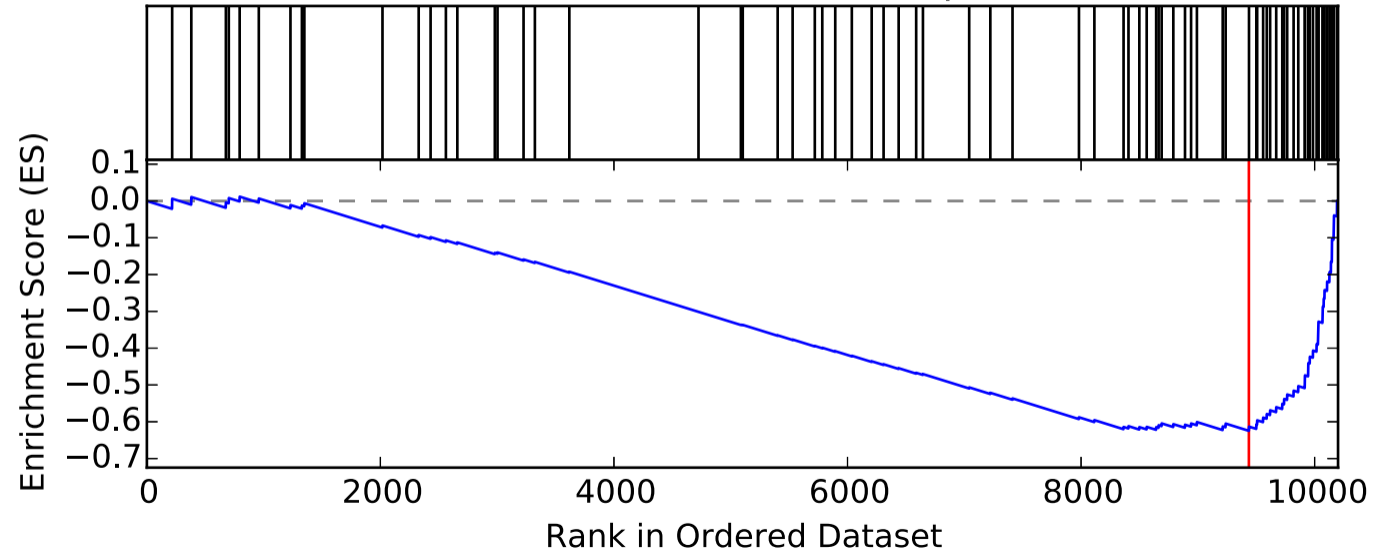

Supplement: 13072_2015_45_MOESM1_ESM.pdf [file 13072_2015_45_MOESM1_ESM.pdf]
